# Supplementary material
Source: PubMed Central journal article supplement (PMC8857062)

**A** Experimental MDA-MB-231Br model

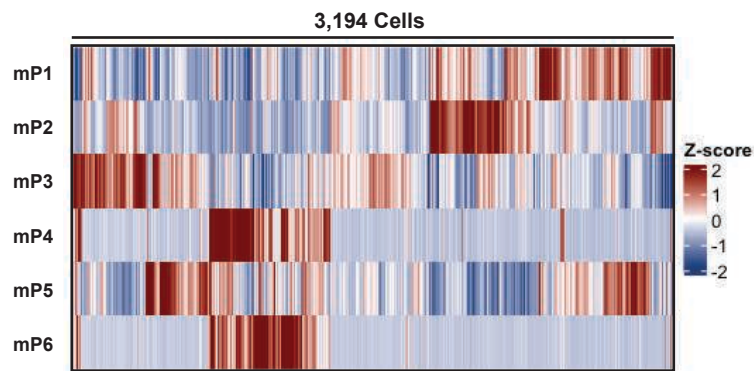

**B**

| Program | Annotation                                    | Selected Genes                                                  |
|---------|-----------------------------------------------|-----------------------------------------------------------------|
| mP1     | Developmental Growth                          | PODXL, HEG1, FSTL3, CDKN1A, EREG, KRT17, SMAD3, SMAD4, TGFB2    |
| mP2     | Developmental Process / Collagen Biosynthesis | CRYAB, COL1A1, COL3A1, FGFR1, LEF1, ITGA1, NOTCH3, LGR6, PDGFRB |
| mP3     | Translation / Ribosome Biogenesis             | FAU, RPL36, RPS21, RPS23, RPL18A, RPL28, RPL41, RPLP1           |
| mP4     | DNA Replication                               | BRCA2, PCNA, CDK1, BLM, FAM11B, CLSPN, DNA2, FEN1               |
| mP5     | Angiogenic Process                            | ADAM8, EPHB2, WNT7B, MYLK, PKM, ADGRG1, ANGPTL4, ROBO4, NOX5    |
| mP6     | Cell Division                                 | CENPA, NEK2, KIF20A, CCNB1, CCNA2, NUF2, NDC80, CENPE           |

**C**

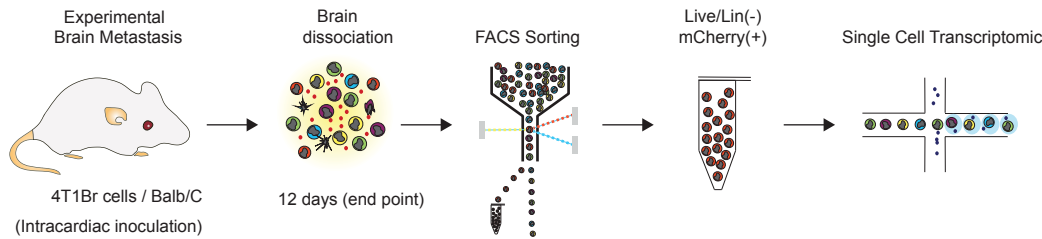

**D**

Experimental 4T1Br model

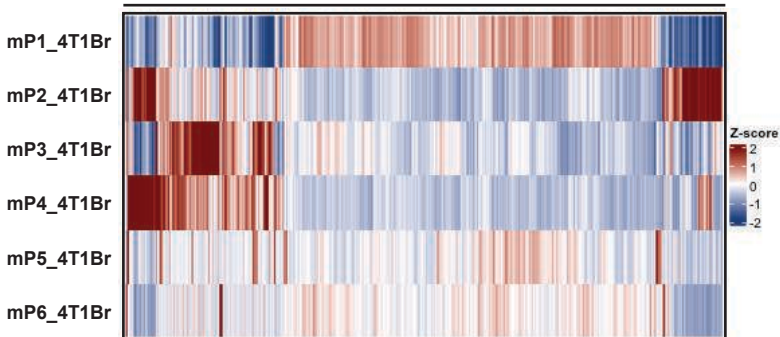

**E**

| Program   | Annotation                                               | Selected Genes                                                |
|-----------|----------------------------------------------------------|---------------------------------------------------------------|
| mP1_4T1Br | Oxidative Phosphorylation / Response to Oxidative Stress | mt-Atp6, Fxn, mt-Cytb, mt-Co1, mt-Co2, mt-Nd3, Hbb-bs, Hba-a2 |
| mP2_4T1Br | Cell Cycle / DNA Replication                             | Atrx, Pcm1, Ccdc88a, Cep290, Kcnq1ot1, Bod11, Rad50, Cep290   |
| mP3_4T1Br | Axon Guidance / Translation                              | Spns1, Lars2, Eif1ax, Actb, Rps12, Arpc4, Arpc2, Ppa1, Ppa2   |
| mP4_4T1Br | Cell Division / Mitosis                                  | Top2a, Hist2h2ac, Mki67, Cenpf, Hmgb2, H2ax, Cdkn2d, Smc2     |
| mP5_4T1Br | Developmental Growth                                     | Ppargc1a, Aplp1, Atp2b4, Ckb, Gnao1, Acvr2b, Fgfr1, Gas6      |
| mP6_4T1Br | Angiogenic Process                                       | Cxcl12, Ptprg, Slc38a3, Ramp2, Dll4, Flt1, Vwa1, Ptn, Ramp2   |

**F**

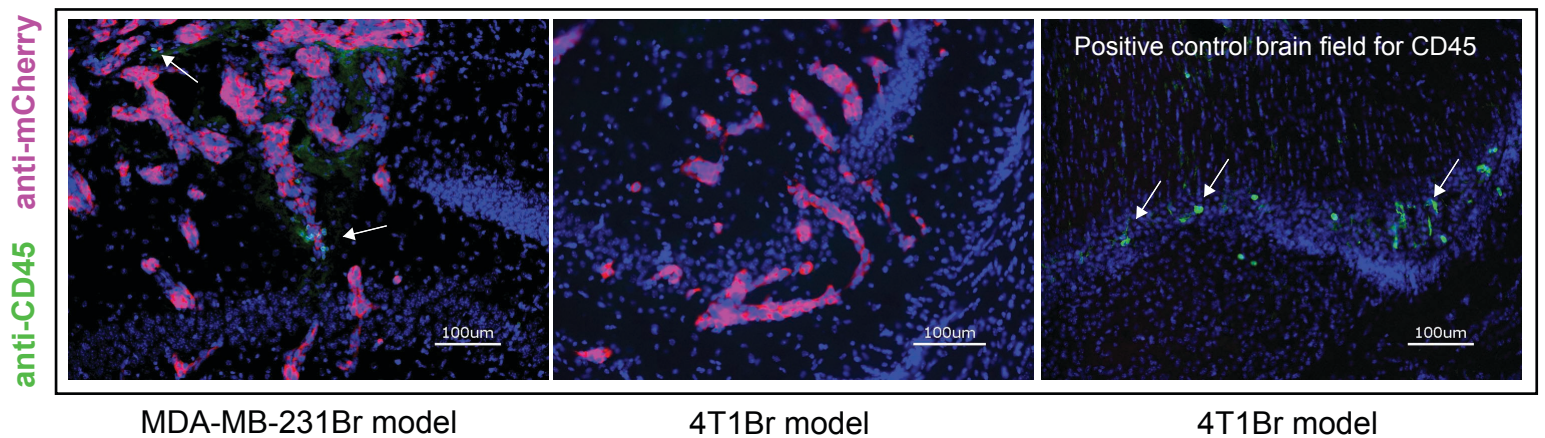

Supplement: NIHMS1768870-supplement-7.pdf [file NIHMS1768870-supplement-7.pdf]
