# Supplementary material
Source: PubMed Central journal article supplement (PMC8857062)

A

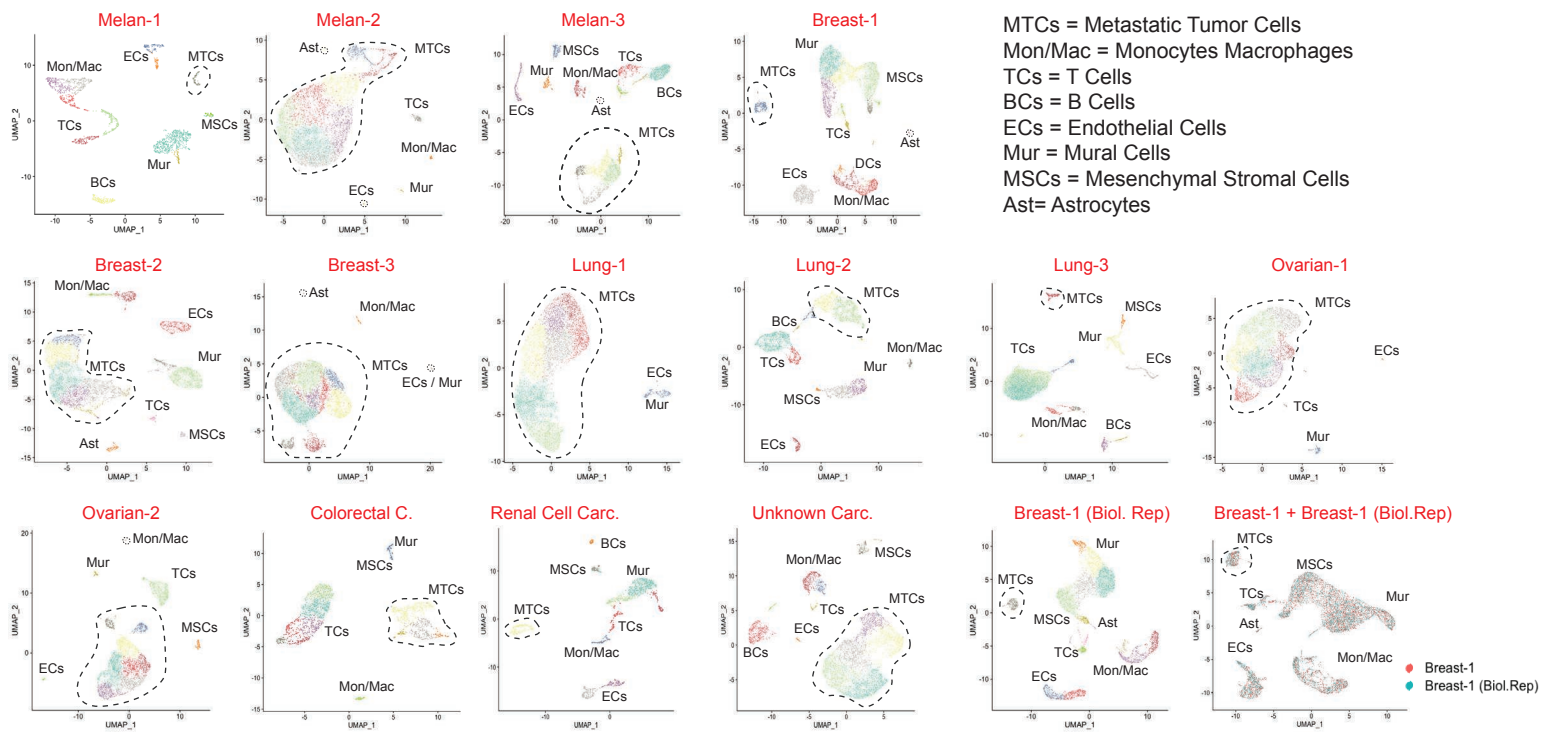

B

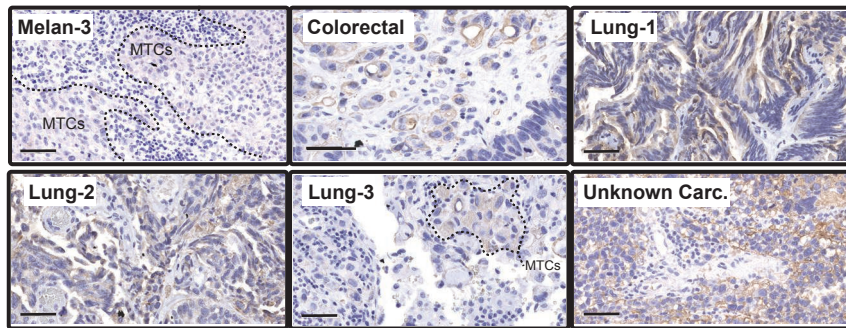

C

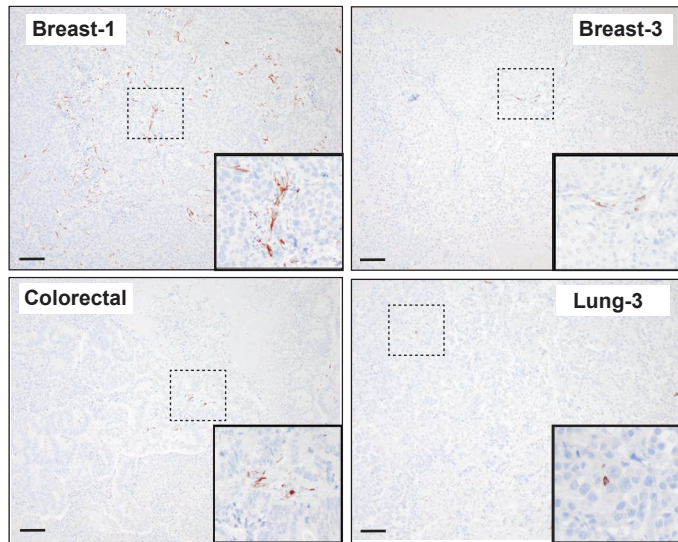

E

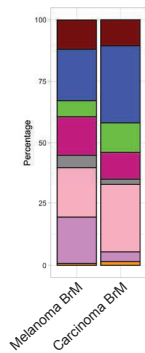

Ident

- Endothelial Cells
- Mural Cells
- Mesenchymal Prog.
- Mono/Macro
- Dendritic Cells
- T Cells
- B Cells
- Astrocytes

F

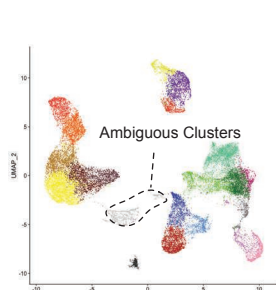

D

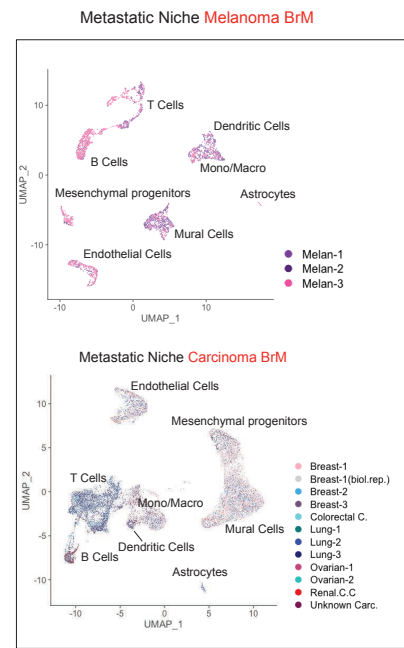

G Parenchymal Rhabdomyosarcoma Brain Metastasis

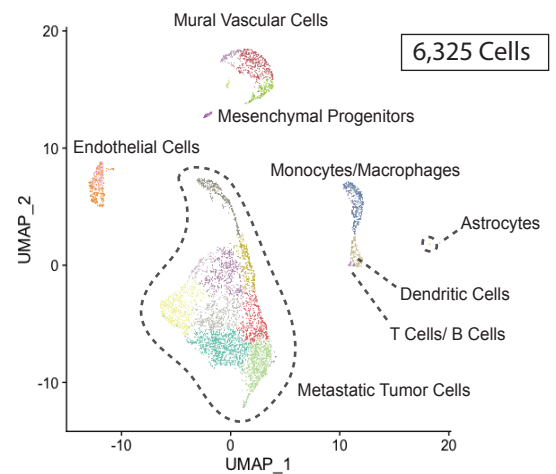

Supplement: NIHMS1768870-supplement-1.pdf [file NIHMS1768870-supplement-1.pdf]
