# Supplementary material
Source: PubMed Central journal article supplement (PMC8857062)

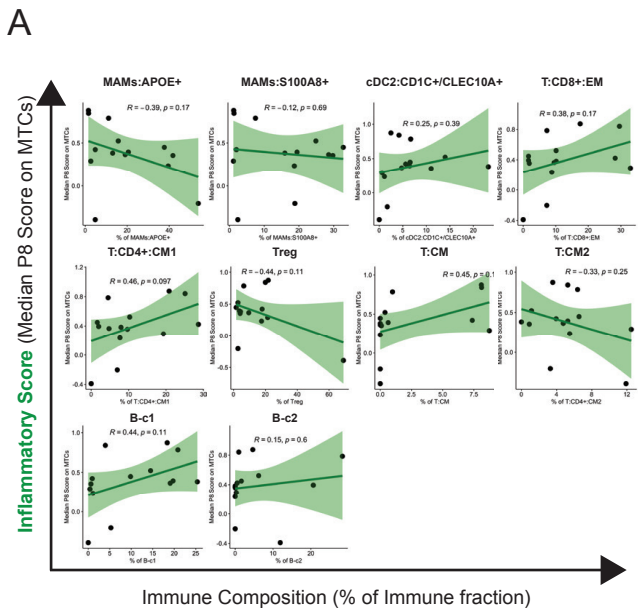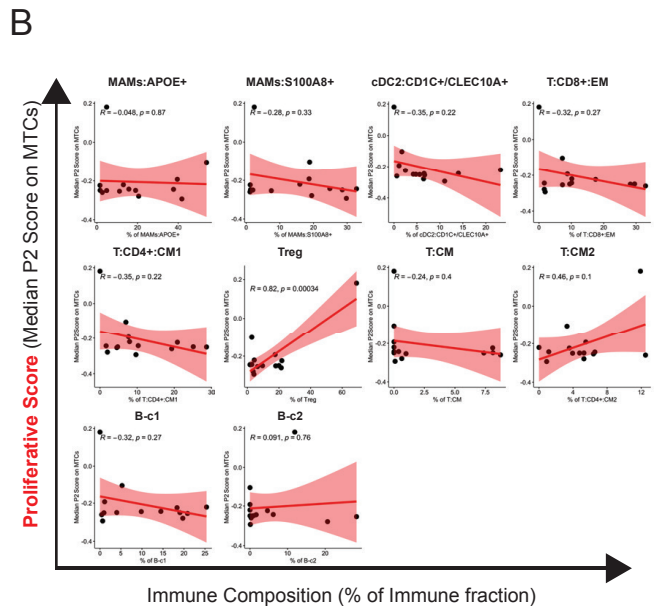

**C** **Primary Breast Cancer (Single Cell Data)**  
Source: Wu, S.Z., et al. Nat Genet 53, 1334–1347 (2021)

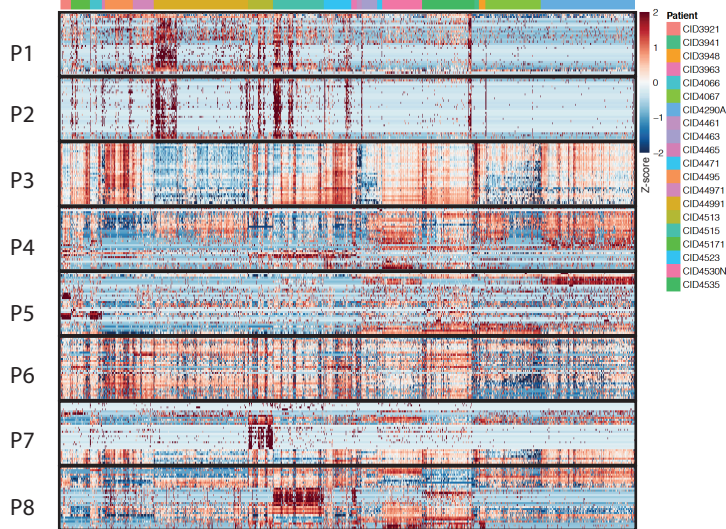

**Primary Lung Adenocarcinoma (Single Cell Data)**  
Source: Kim, N., et al. Nat Commun 11, 2285 (2020)

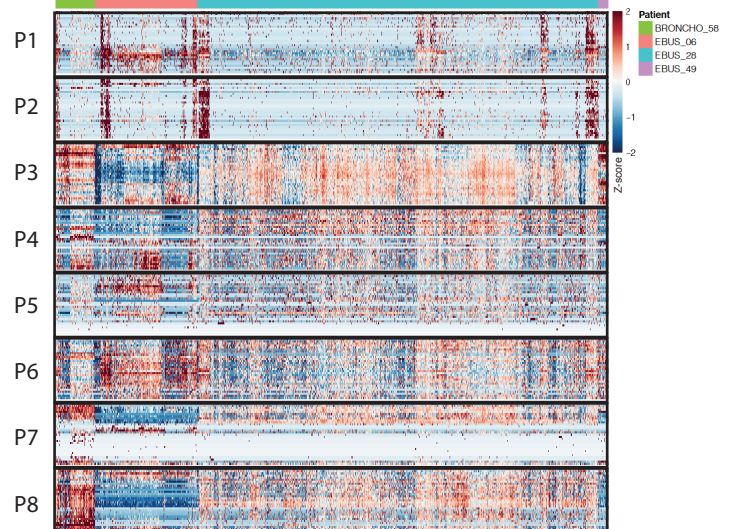

**Primary Melanoma (Single Cell Data)**  
Source: Tirosh, I., et al. Science, Vol 352, 6282 (2016)

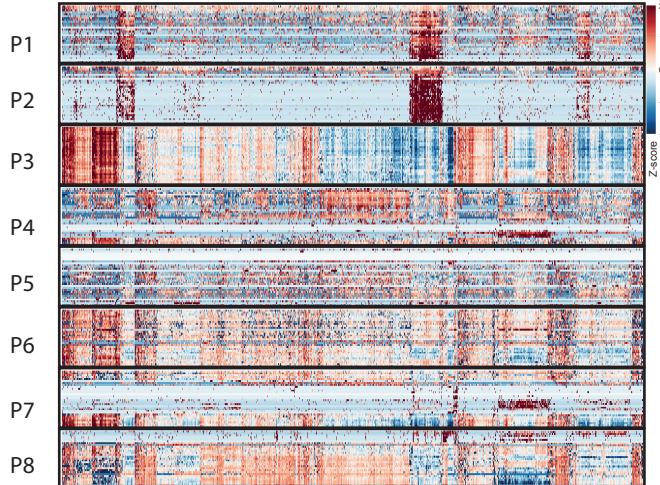

**Glioblastoma (Single Cell Data)**  
Source: Neftel, C., et al. Cell, Vol 178, 835 (2019)

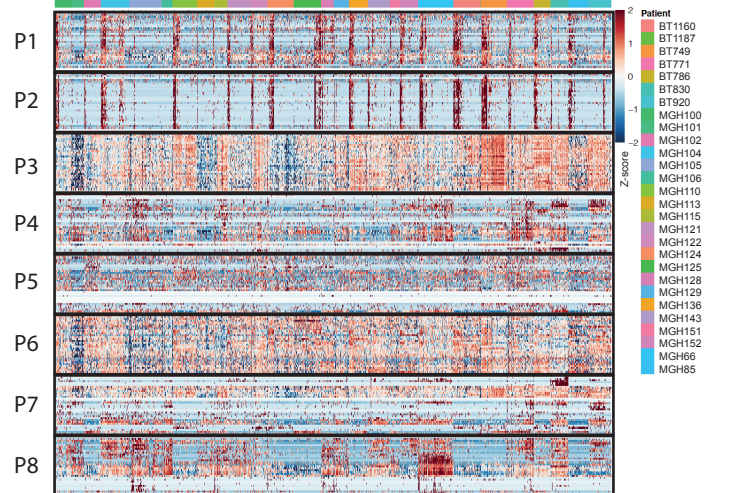

Supplement: NIHMS1768870-supplement-6.pdf [file NIHMS1768870-supplement-6.pdf]
