# Supplementary material
Source: PubMed Central journal article supplement (PMC8857062)

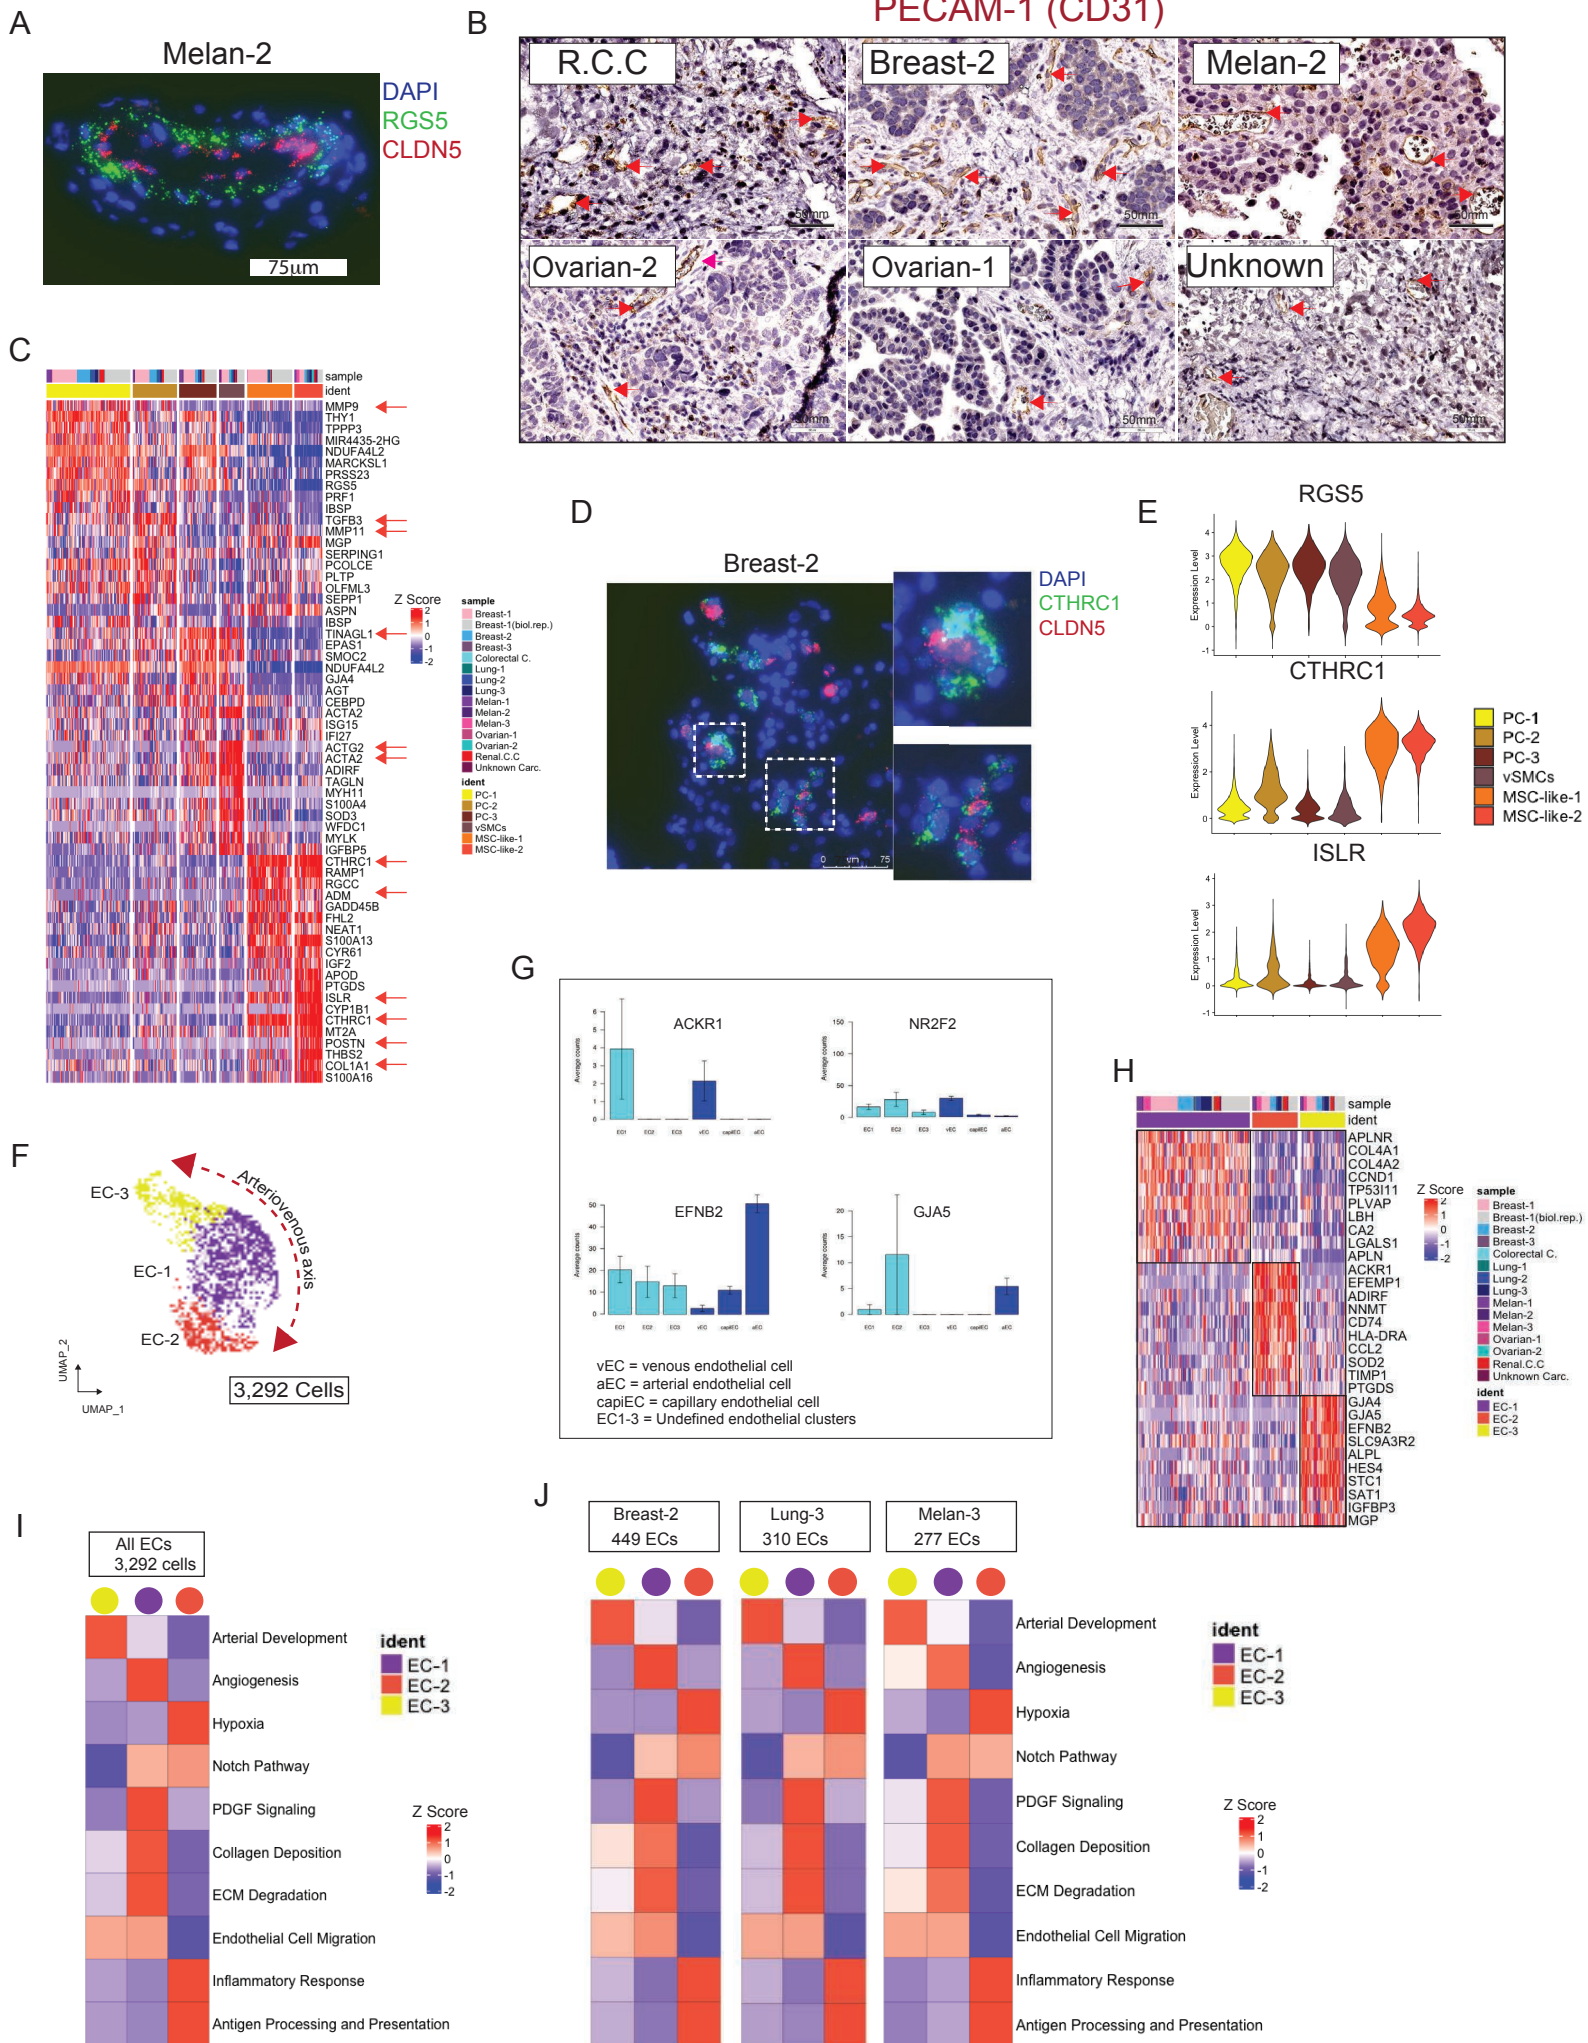

Supplement: NIHMS1768870-supplement-2.pdf [file NIHMS1768870-supplement-2.pdf]

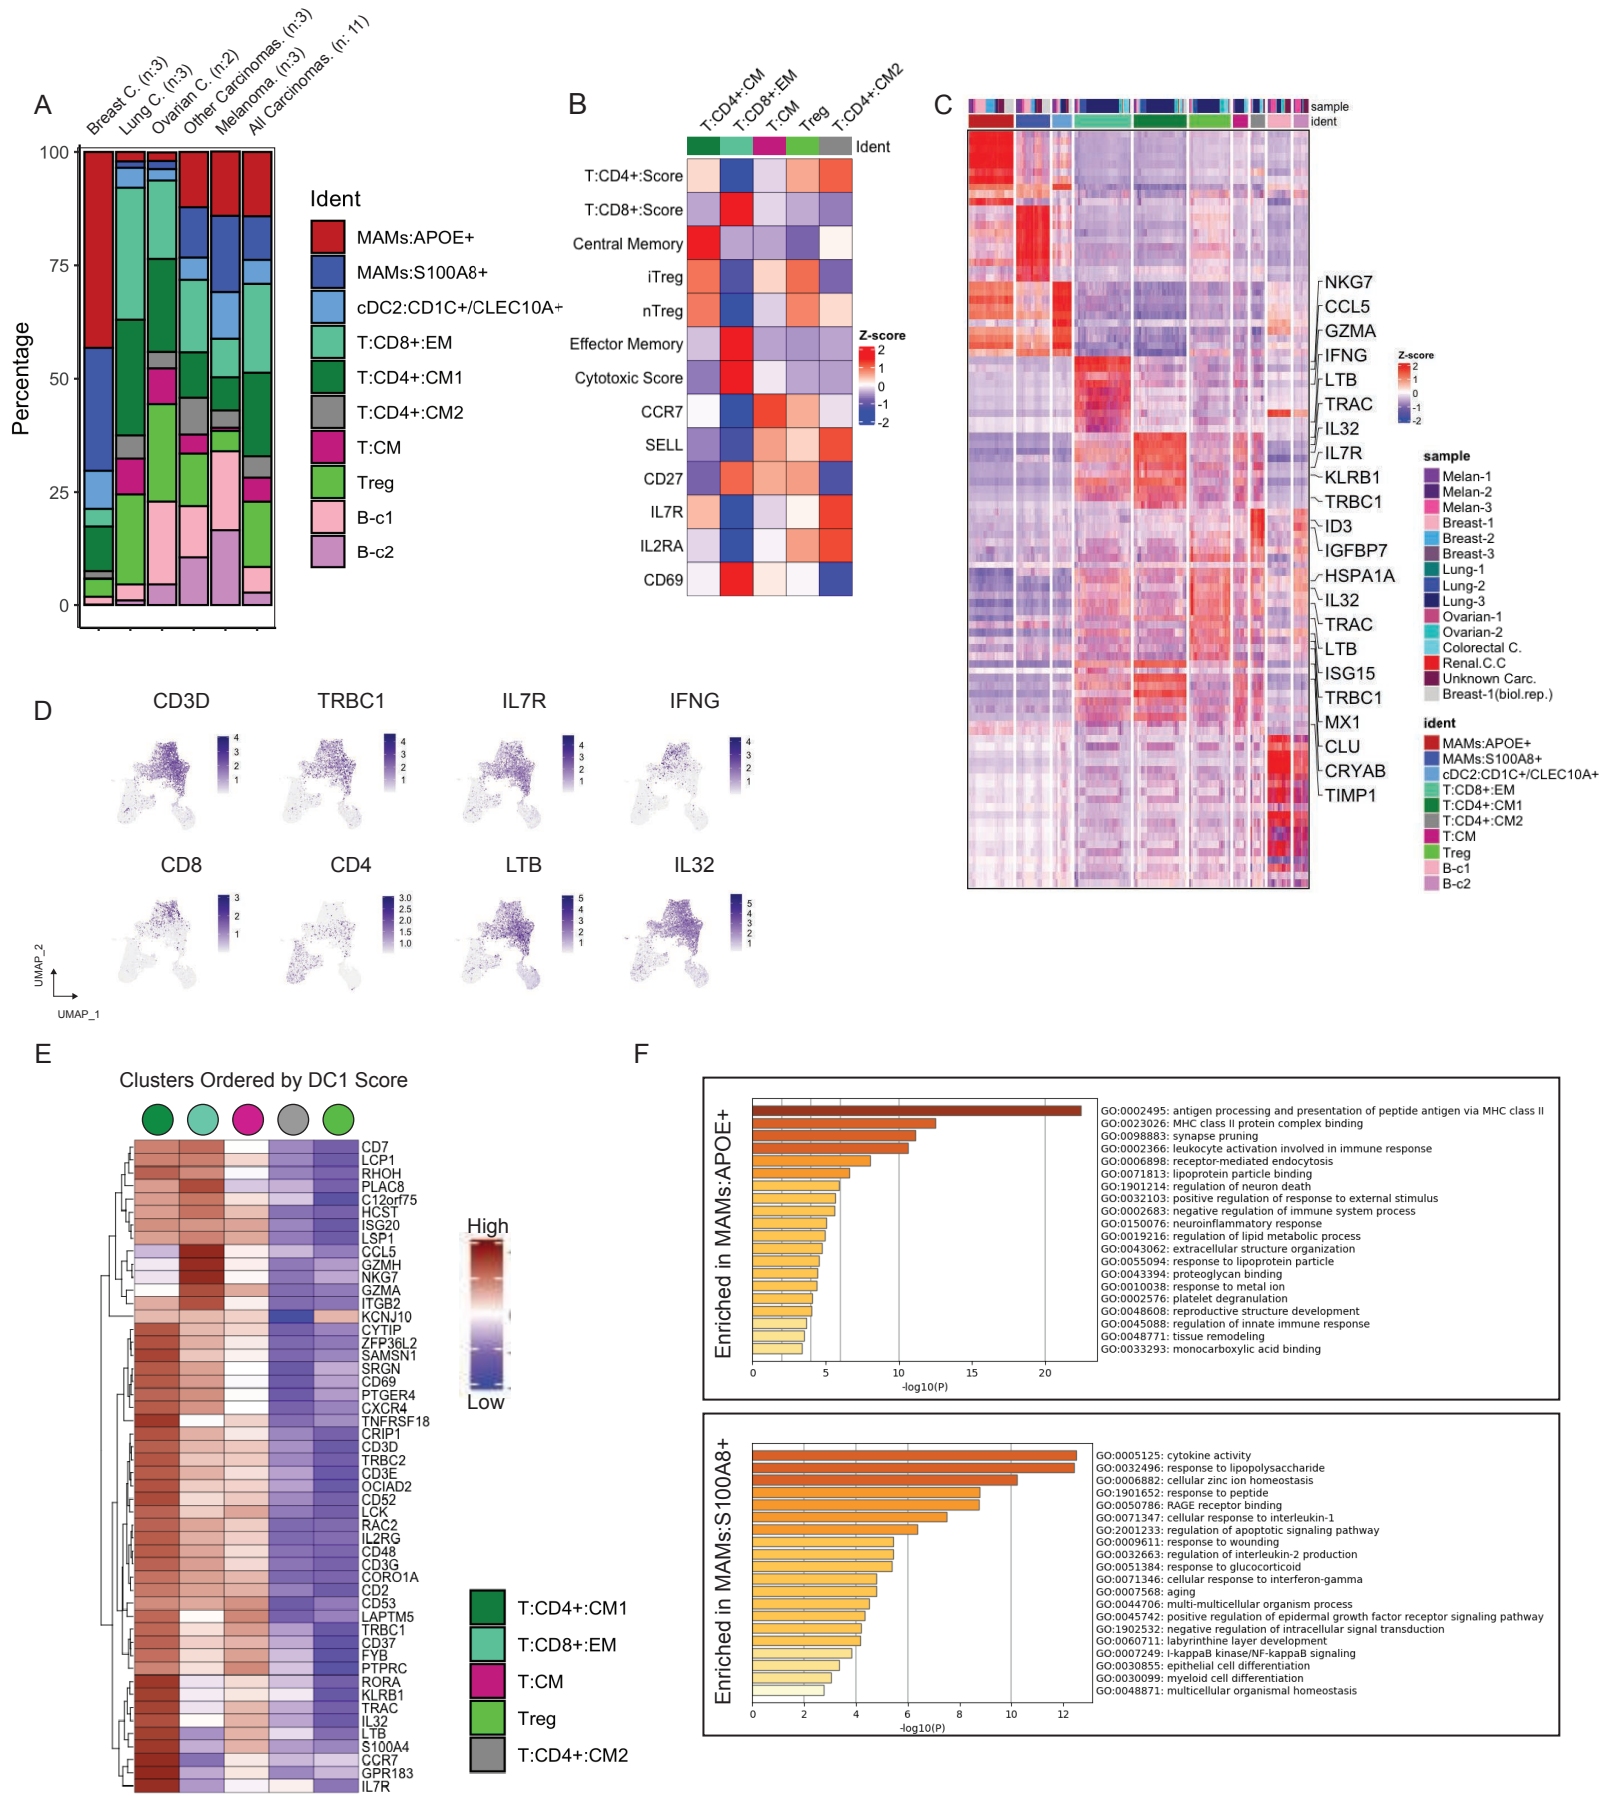

Supplement: NIHMS1768870-supplement-3.pdf [file NIHMS1768870-supplement-3.pdf]

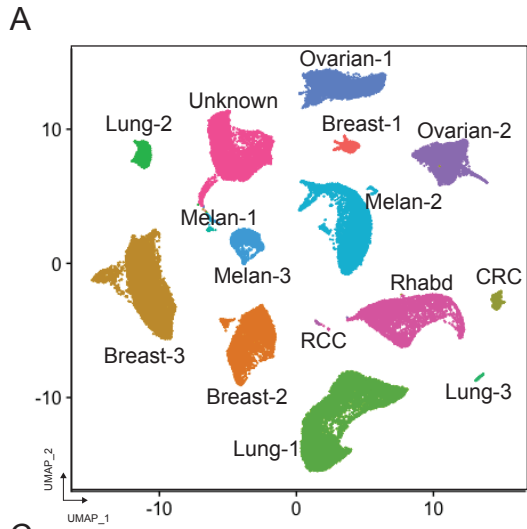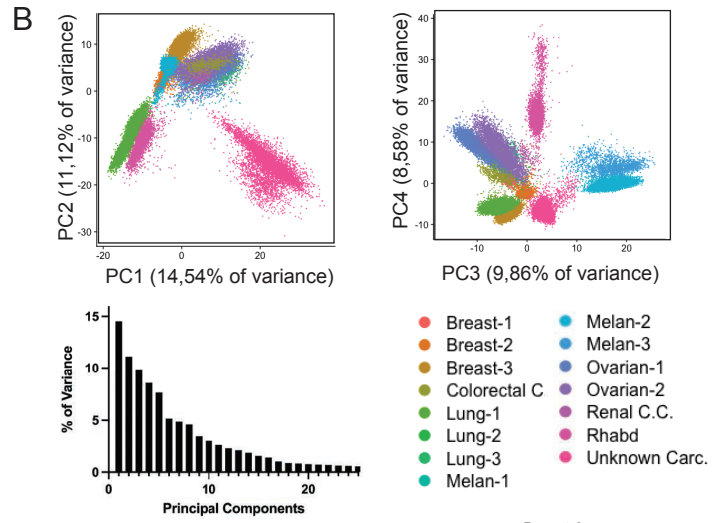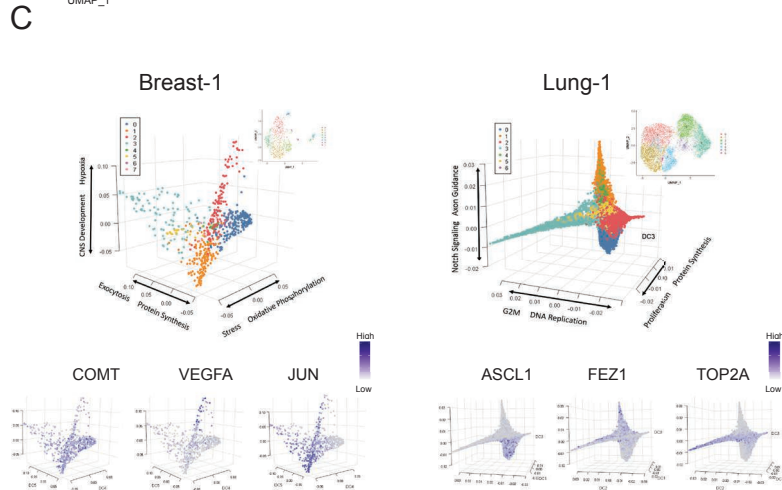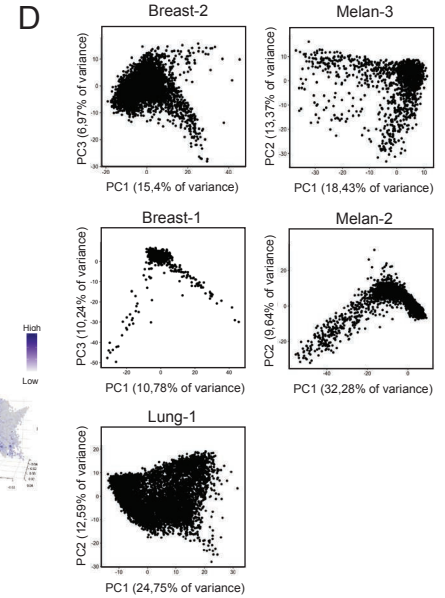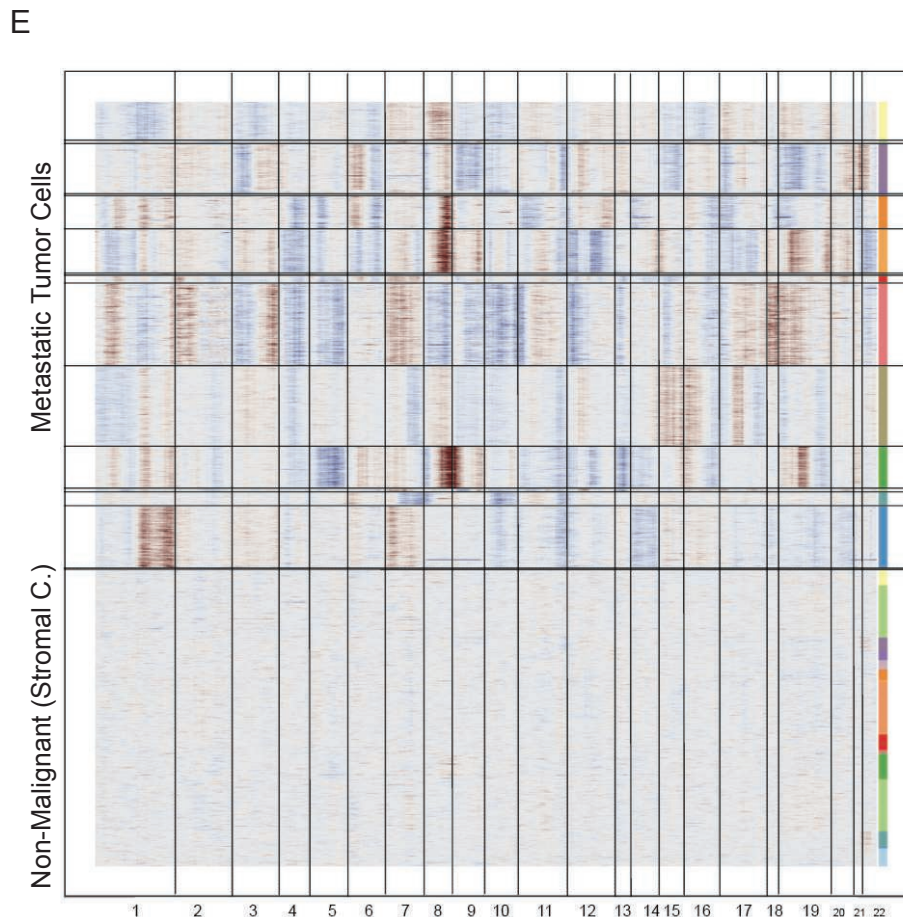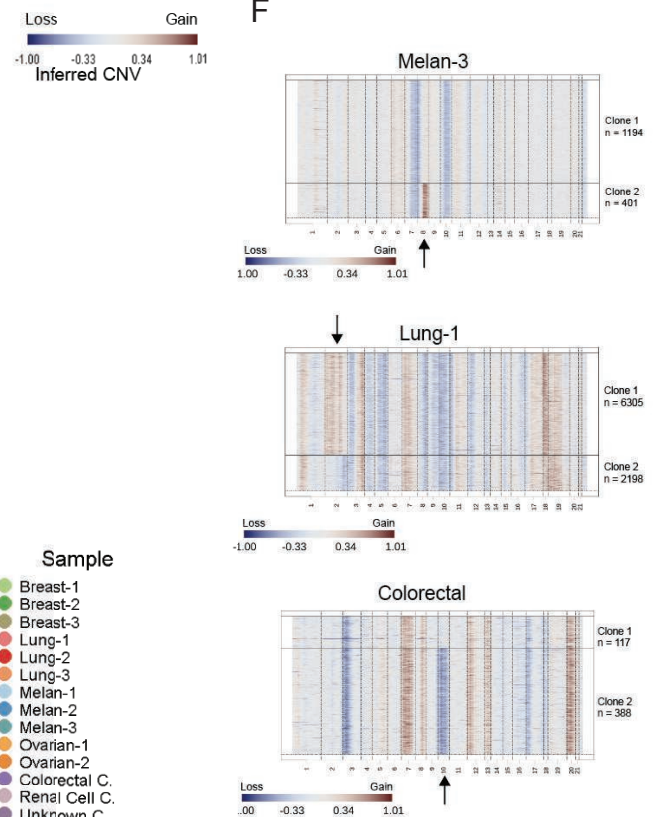

Supplement: NIHMS1768870-supplement-5.pdf [file NIHMS1768870-supplement-5.pdf]

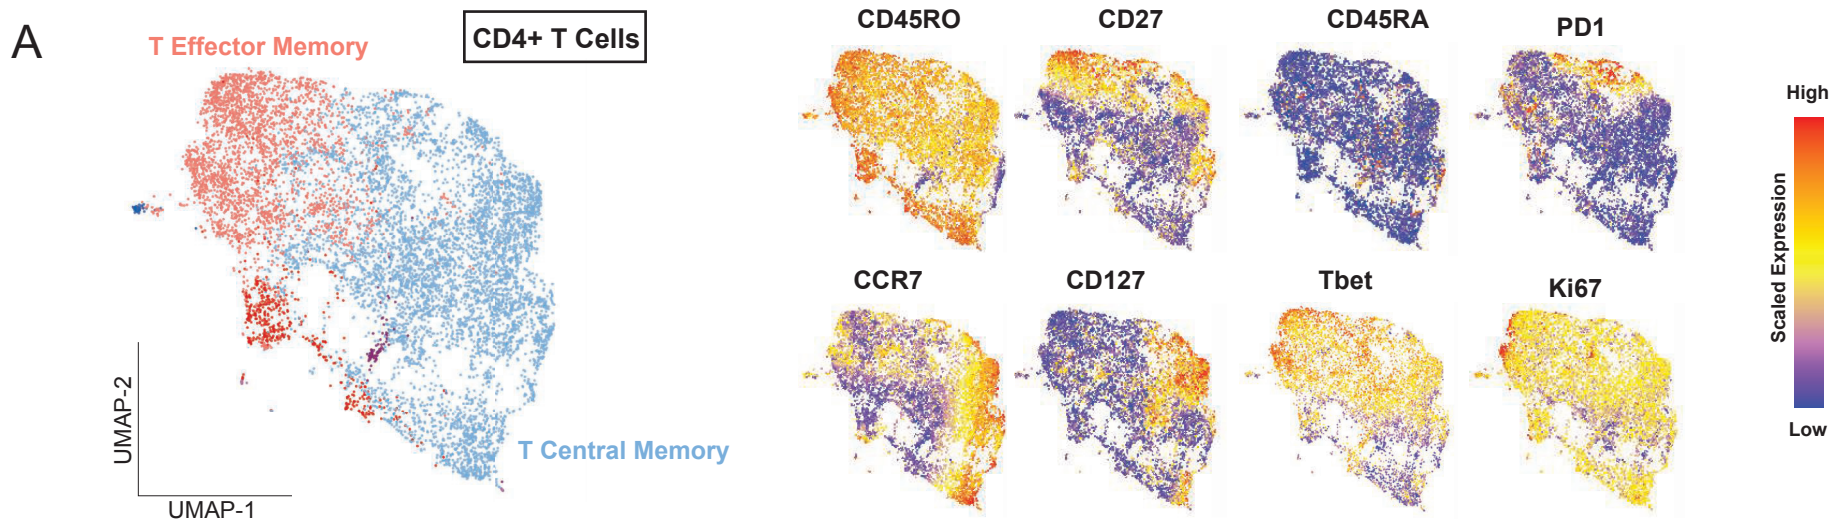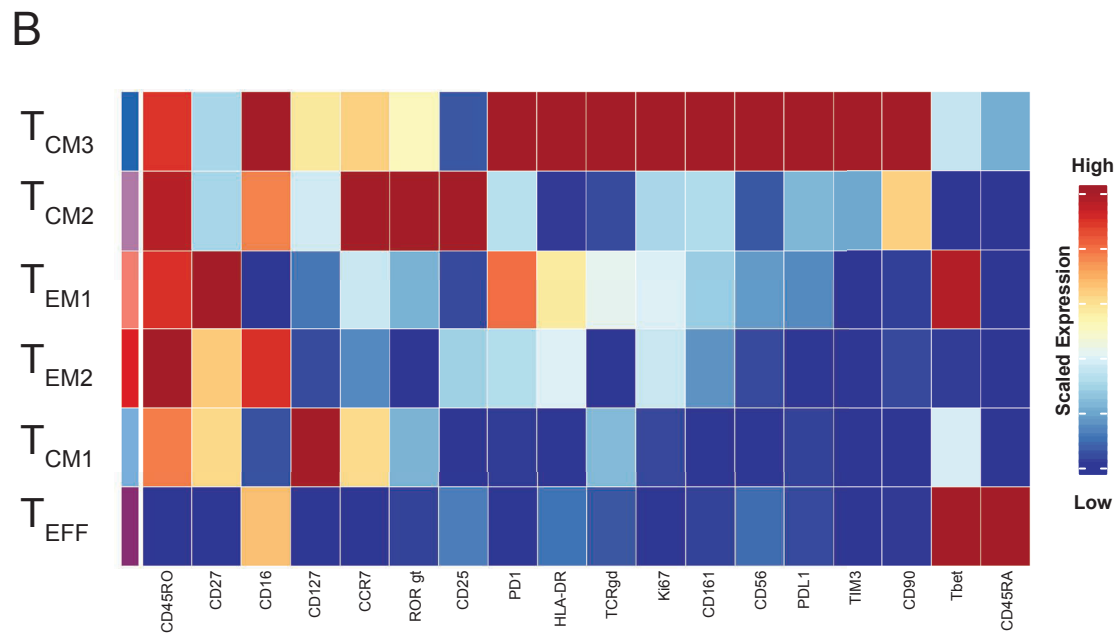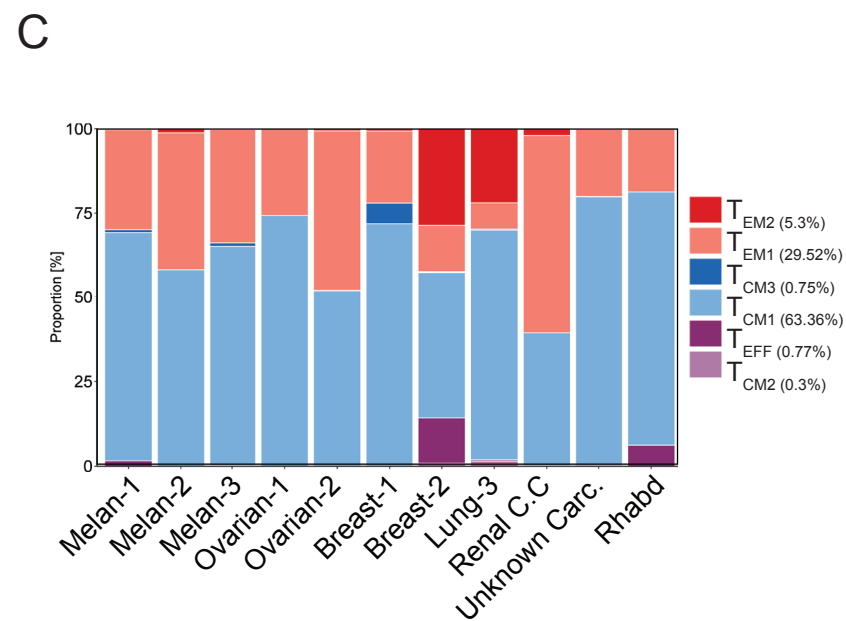

Supplement: NIHMS1768870-supplement-Figure_S4.pdf [file NIHMS1768870-supplement-Figure_S4.pdf]
